# Supplementary material for: Transitioning Focus Group Research to a Videoconferencing Environment: A Descriptive Analysis of Interactivity
Source: MDPI journal article supplement (doi:10.3390/pharmacy9030117), 2021-06-24
Supplement: s1 [file s1]

Table S1

**Provider Deprescribing Focus Group Questions**  
**May 2020**

| <b>Topic and/or Question</b>                                                                                                                                                                                                                                                                                                                                      |
|-------------------------------------------------------------------------------------------------------------------------------------------------------------------------------------------------------------------------------------------------------------------------------------------------------------------------------------------------------------------|
| <b>Q1.</b> When prescribing opioids for older adults (65+), what do you take into consideration? <ul style="list-style-type: none"> <li>• [PROBE] Patient goal(s)?</li> <li>• [PROBE] Family goal(s)?</li> <li>• [PROBE] Provider goal(s)?</li> <li>• [PROBE] What indications?</li> <li>• [PROBE] Safety vs effectiveness (risks vs benefits)</li> </ul>         |
| <b>Q2.</b> What do you tell your patients when starting an opioid for the first time? <ul style="list-style-type: none"> <li>• [PROBE] Appropriate use</li> <li>• [PROBE] Length of therapy</li> <li>• [PROBE] Safety vs effectiveness (risks vs benefits)</li> </ul>                                                                                             |
| <b>Q3.</b> What do you tell your patients when refilling an opioid prescription?                                                                                                                                                                                                                                                                                  |
| <b>Q4.</b> Have you ever weaned a patient from an opioid, and if so, what was that experience like? <ul style="list-style-type: none"> <li>• [PROBE] How did you initiate that conversation with the patient?</li> <li>• [PROBE] What, if anything, do you wish you had done differently?</li> </ul>                                                              |
| <b>Q5.</b> When prescribing benzodiazepines for older adults (65+), what do you take into consideration? <ul style="list-style-type: none"> <li>• [PROBE] Patient goal(s)?</li> <li>• [PROBE] Family goal(s)?</li> <li>• [PROBE] Provider goal(s)?</li> <li>• [PROBE] What indications?</li> <li>• [PROBE] Safety vs effectiveness (risks vs benefits)</li> </ul> |
| <b>Q6.</b> What do you tell your patients when starting a benzodiazepine for the first time? <ul style="list-style-type: none"> <li>• [PROBE] Appropriate use</li> <li>• [PROBE] Length of therapy</li> <li>• [PROBE] Safety vs effectiveness (risks vs benefits)</li> </ul>                                                                                      |
| <b>Q7.</b> What do you tell your patients when refilling a benzodiazepine prescription?                                                                                                                                                                                                                                                                           |
| <b>Q8.</b> Have you ever weaned a patient from a benzodiazepine, and if so, what was that experience like? <ul style="list-style-type: none"> <li>• [PROBE] How did you initiate that conversation with the patient?</li> <li>• [PROBE] What, if anything, do you wish you had done differently?</li> </ul>                                                       |
| <b>Q9.</b> What advice, if any, would you give a fellow provider about weaning a patient from opioids or benzodiazepines?                                                                                                                                                                                                                                         |
| <b>Q10.</b> What kind of a prompt would you find useful in your electronic medical record to assist you with de-prescribing opioids and/or benzodiazepines?                                                                                                                                                                                                       |
| <b>Q11.</b> Would you consider implementing this in your practice?                                                                                                                                                                                                                                                                                                |

|                                                                                                                                                                                                                                       |
|---------------------------------------------------------------------------------------------------------------------------------------------------------------------------------------------------------------------------------------|
| <ul style="list-style-type: none"><li>• [PROBE] What are your thoughts on this guideline?</li><li>• [PROBE] What resources would be needed?</li><li>• [PROBE] What, if anything, would get in the way of implementing this?</li></ul> |
| <b>Q12.</b> Which pharmacological alternative therapies do you feel the most comfortable recommending for pain management?                                                                                                            |
| <b>Q13.</b> Which pharmacological alternative therapies do you feel the most comfortable recommending for anxiety?                                                                                                                    |
| <b>Q14.</b> Which pharmacological alternative therapies do you feel the most comfortable recommending for sleep/insomnia?                                                                                                             |
| <b>Q15.</b> Which non-pharmacological alternatives do you feel the most comfortable recommending for pain management?                                                                                                                 |
| <b>Q16.</b> Which non-pharmacological alternatives do you feel the most comfortable recommending for anxiety?                                                                                                                         |
| <b>Q17.</b> Which non-pharmacological alternatives do you feel the most comfortable recommending for sleep/insomnia?                                                                                                                  |
| <b>Q18.</b> What advice, if any, would you give a fellow provider about recommending alternatives therapies for pain management, anxiety, or sleep?                                                                                   |
| <b>Q19.</b> What training(s) in alternative therapies (other than medications) would be helpful for pain management, anxiety reduction, and/or sleep management?                                                                      |
| <b>Q20.</b> Is there something you'd like to discuss that we haven't talked about?                                                                                                                                                    |
